# Supplementary material for: The Role of Hidden Conformers in Determination of Conformational Preferences of Mefenamic Acid by NOESY Spectroscopy
Source: MDPI journal article supplement (doi:10.3390/pharmaceutics14112276), 2022-10-24
Supplement: s1 [file s1]

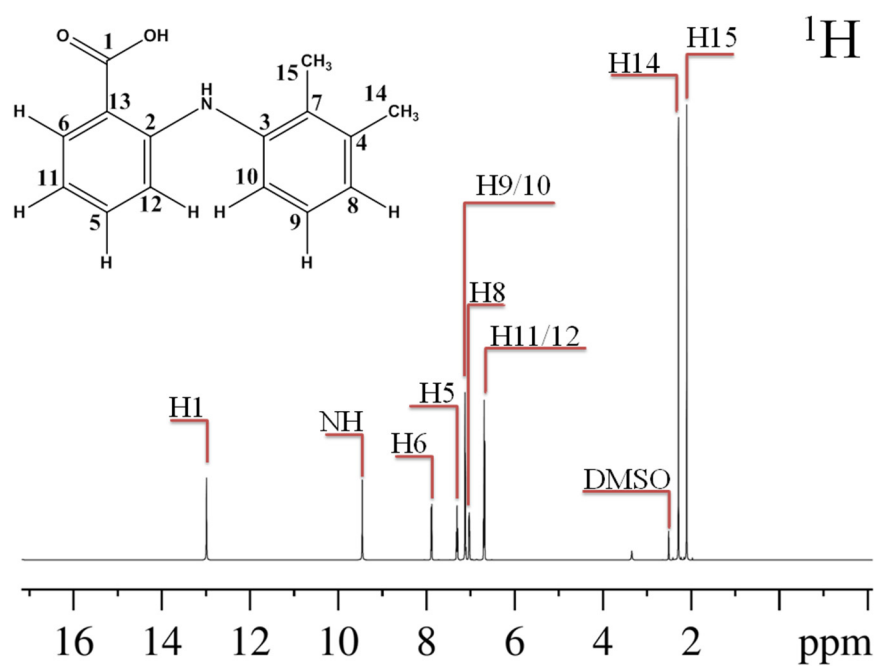

**Figure S1.** The <sup>1</sup>H NMR spectrum of MFA in DMSO-d<sub>6</sub>.

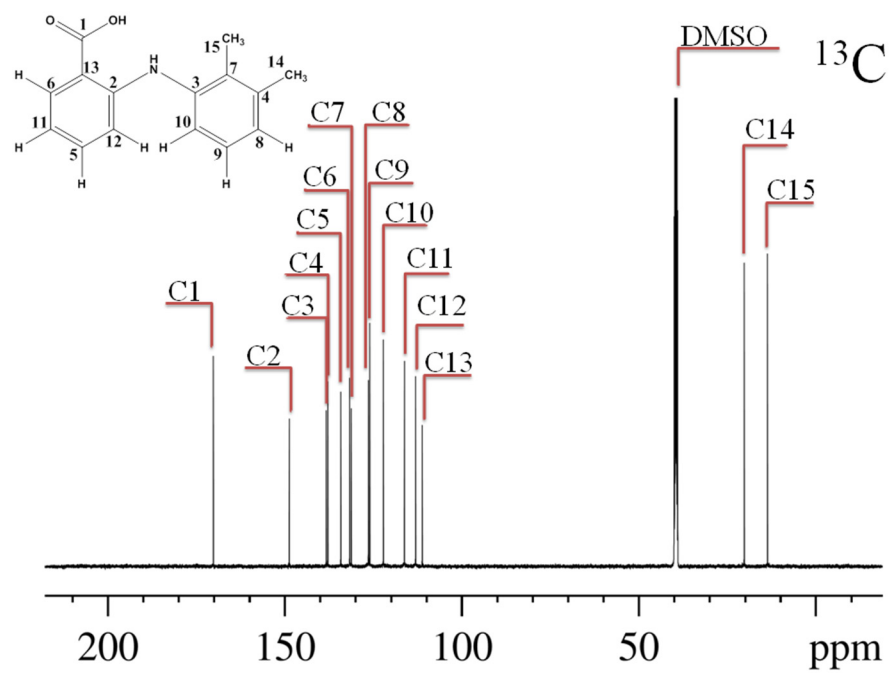

**Figure S2.** The <sup>13</sup>C NMR spectrum of MFA in DMSO-d<sub>6</sub>.

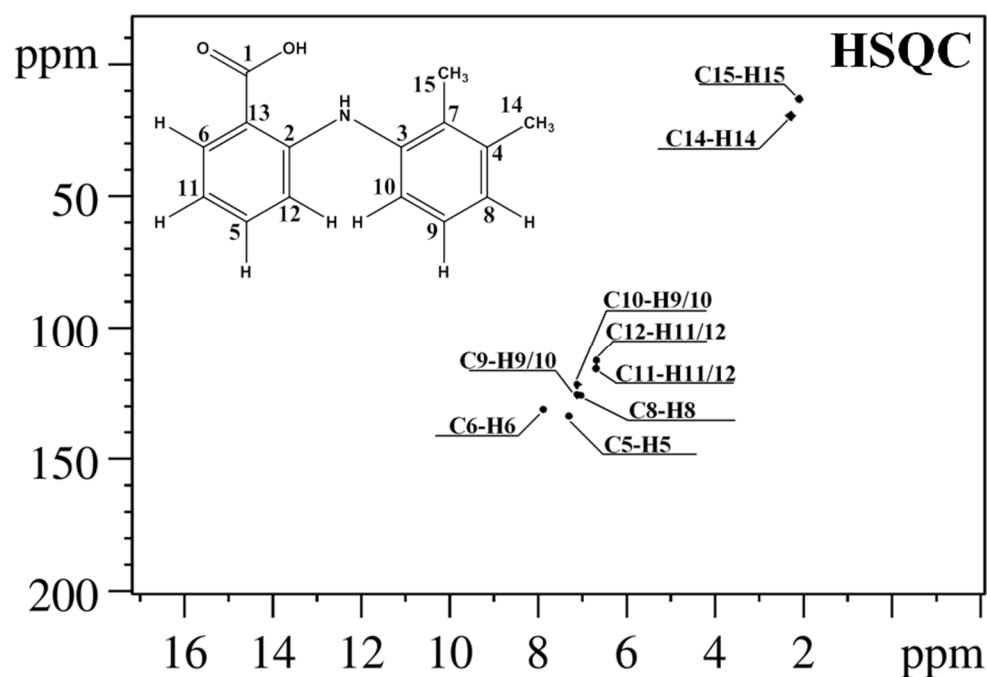

Figure S3. The  $^1\text{H}$ - $^{13}\text{C}$  HSQC spectrum of MFA in  $\text{DMSO-d}_6$ .

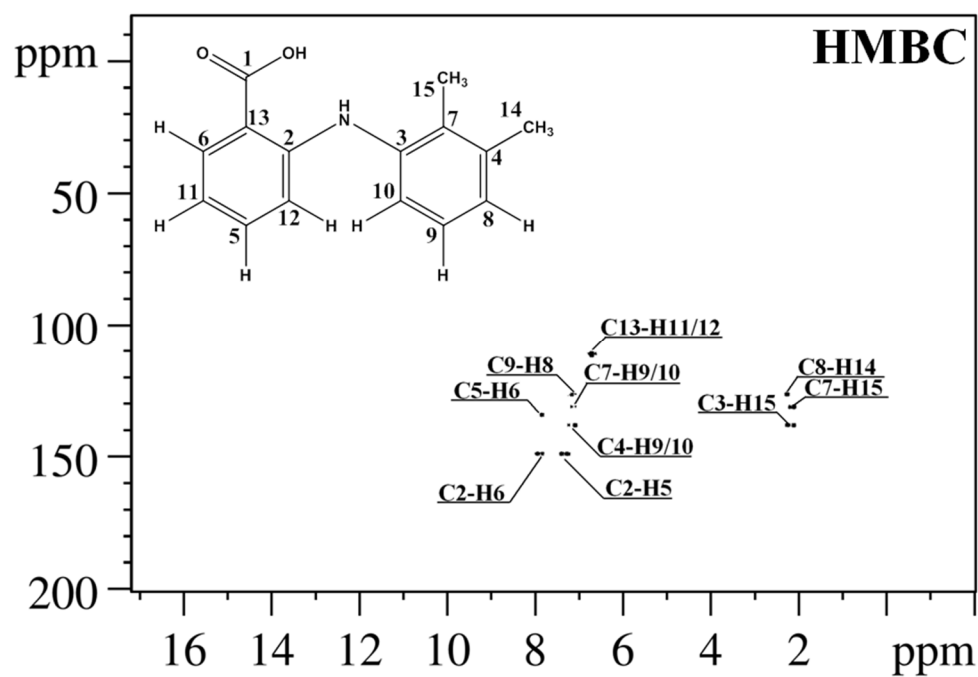

Figure S4. The  $^1\text{H}$ - $^{13}\text{C}$  HMBC spectrum of MFA in  $\text{DMSO-d}_6$ .

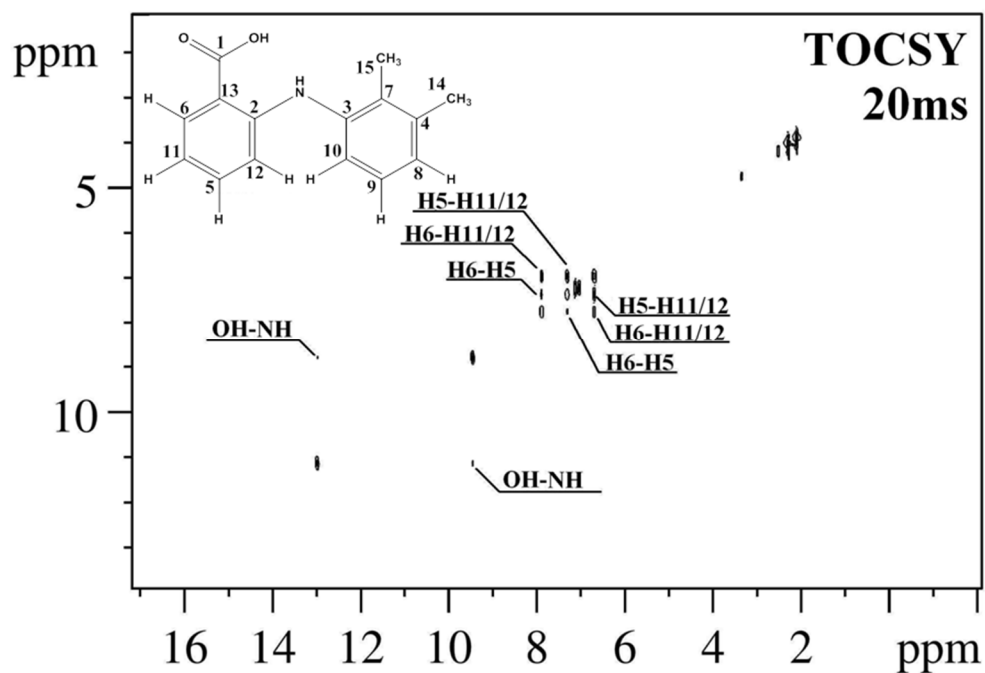

Figure S5. The  $^1\text{H}$ - $^1\text{H}$  TOCSY spectrum (spin-lock 20 ms) of MFA in  $\text{DMSO-d}_6$ .

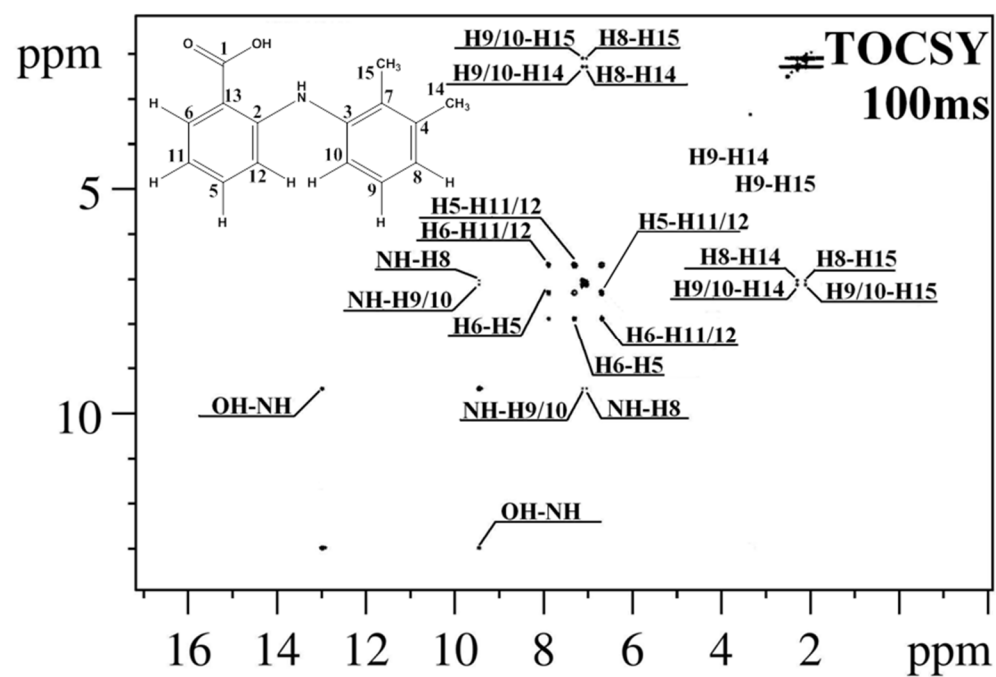

Figure S6. The  $^1\text{H}$ - $^1\text{H}$  TOCSY spectrum (spin-lock 100 ms) of MFA in  $\text{DMSO-d}_6$ .

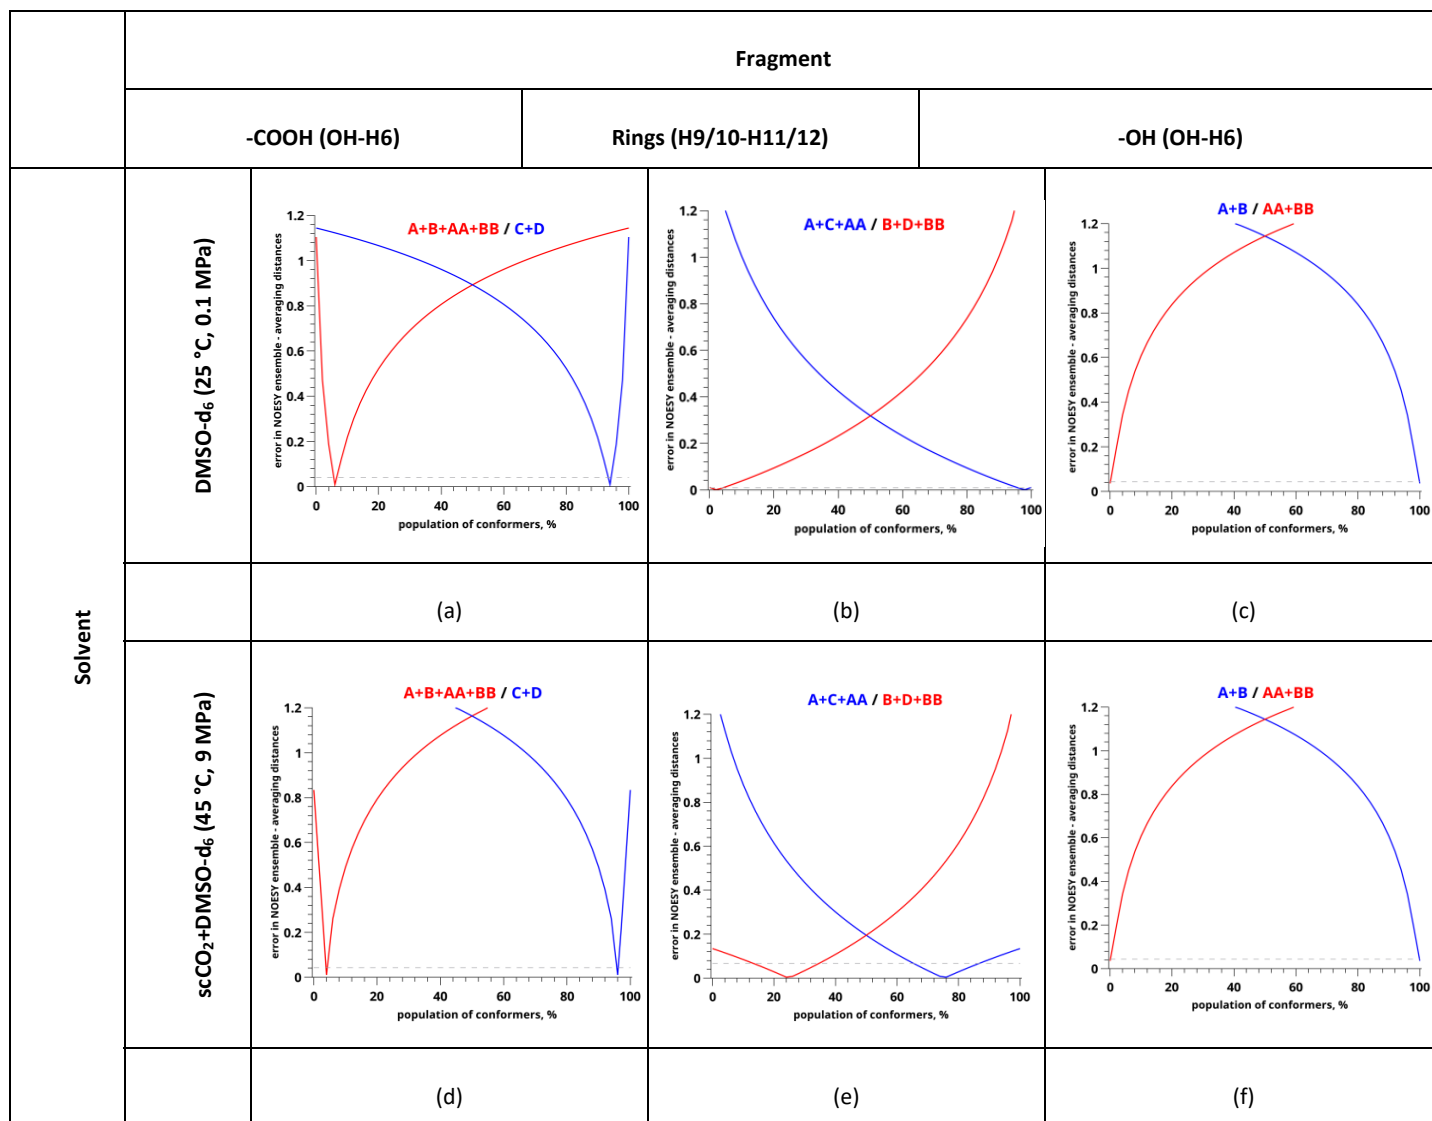

**Figure S7.** The plots of populations of the conformer groups (blue and red curves) of MFA in (a–c) DMSO-d<sub>6</sub> and (d–f) scCO<sub>2</sub>+DMSO; dashed gray line shows the error level of determining the distances.

**Table S1.** The chemical shift of the  $^1\text{H}$  and  $^{13}\text{C}$  nuclei is determined by 2D spectra of the MFA molecule in  $\text{DMSO-d}_6$ .

| $\delta\ ^{13}\text{C}$ | $^1\text{H}$ | $\delta\ ^1\text{H}$ | HMBC    | HSQC    | NOESY                                    | TOCSY     |           | $^{13}\text{C}$ |
|-------------------------|--------------|----------------------|---------|---------|------------------------------------------|-----------|-----------|-----------------|
|                         |              |                      |         |         |                                          | 20mc      | 100mc     |                 |
| 170.18                  | OH           | 12.99                | -       | -       | OH-H15<br>OH-H9/10<br>OH-H6<br>OH-NH     | -         | -         | C1              |
| 148.73                  | NH           | 9.45                 | C2-H5   | -       | NH-H15<br>NH-H11/12<br>NH-H9/10<br>NH-H6 | OH-HN     | OH-HN     | C2              |
| 138.32                  | -            | -                    | C3-H10  | -       |                                          | -         | HN-H9/10  | C3              |
| 137.86                  | -            | -                    | C3-H15  | -       |                                          | -         | HN-H8     | C4              |
| 134.17                  | H5           | 7.31                 | -       | C5-H5   | H5-H11/12                                | H5-H6     | H5-H6     | C5              |
| 131.68                  | H6           | 7.88                 | -       | C6-H6   | H6-H11/12                                | H5-H11/12 | H5-H11/12 | C6              |
| 131.22                  | -            | -                    | C7-H15  | -       |                                          | H6-H11/12 | H6-H11/12 | C7              |
| 126.39                  | H8           | 7.03                 | C8-H14  | C8-H8   | H8-H14                                   | -         | H8-H14    | C8              |
| 126.00                  | H9/10        | 7.12                 | -       | C9-H9   | H9/10-H11/12                             | -         | H8-H15    | C9              |
| 122.17                  |              |                      | -       | C10-H10 |                                          | -         | H9/10-H14 | C10             |
| 116.22                  | H11/12       | 6.69                 | -       | C11-H11 | H11/12-H15                               | -         | H9/10-H15 | C11             |
| 113.05                  |              |                      | -       | C12-H12 |                                          | -         | -         | C12             |
| 111.19                  | -            | -                    | C13-H12 | -       |                                          | -         | -         | C13             |
| 20.19                   | H14          | 2.29                 | C14-H15 | C14-H14 |                                          | -         | -         | C14             |
| 13.64                   | H15          | 2.10                 | -       | C15-H15 |                                          | -         | -         | C15             |

**Table S2.** Normalized integral intensities of the cross-peaks, cross-relaxation rates, and proton-proton distances in the MFA molecule used to calculate the conformer's populations in  $\text{DMSO-d}_6$ .

| Groups     | $r_{\text{calc}}, \text{\AA}$ | Dist.           | Relative Integral Intensity |        | Cross-Relaxation Rate, $\text{s}^{-1}$ | $r_{\text{exp}}, \text{\AA}$ |
|------------|-------------------------------|-----------------|-----------------------------|--------|----------------------------------------|------------------------------|
| A-BB       | 2.76                          | H6-H11/12 (Ref) | 0.15                        | 0.0047 | $3.34 \pm 0.02 \times 10^{-2}$         | -                            |
|            |                               |                 | 0.2                         | 0.0065 |                                        |                              |
|            |                               |                 | 0.25                        | 0.0085 |                                        |                              |
|            |                               |                 | 0.3                         | 0.0103 |                                        |                              |
|            |                               |                 | 0.35                        | 0.0117 |                                        |                              |
|            |                               |                 | 0.4                         | 0.0134 |                                        |                              |
|            |                               |                 | 0.45                        | 0.015  |                                        |                              |
|            |                               |                 | 0.5                         | 0.0167 |                                        |                              |
|            |                               |                 | 0.55                        | 0.0183 |                                        |                              |
|            |                               |                 | 0.6                         | 0.0197 |                                        |                              |
|            |                               |                 | 0.65                        | 0.0216 |                                        |                              |
|            |                               |                 | 0.7                         | 0.0231 |                                        |                              |
|            |                               |                 | 0.75                        | 0.0255 |                                        |                              |
|            |                               |                 | 0.8                         | 0.0264 |                                        |                              |
|            |                               |                 | 0.85                        | 0.0283 |                                        |                              |
|            |                               |                 | 0.9                         | 0.0302 |                                        |                              |
| A + C + AA | 3.12                          | H9/10-H11/12    | 0.15                        | 0.0022 | $1.57 \pm 0.02 \times 10^{-2}$         | $3.13 \pm 0.009$             |
|            |                               |                 | 0.2                         | 0.0028 |                                        |                              |
|            |                               |                 | 0.25                        | 0.0044 |                                        |                              |
|            |                               |                 | 0.3                         | 0.0046 |                                        |                              |
|            |                               |                 | 0.35                        | 0.0055 |                                        |                              |
|            |                               |                 | 0.4                         | 0.0064 |                                        |                              |
|            |                               |                 | 0.45                        | 0.0071 |                                        |                              |

|                 |      |       |      |        |                                |                 |
|-----------------|------|-------|------|--------|--------------------------------|-----------------|
| B + D + BB      | 4.62 |       | 0.5  | 0.0079 |                                |                 |
|                 |      |       | 0.55 | 0.0086 |                                |                 |
|                 |      |       | 0.6  | 0.0096 |                                |                 |
|                 |      |       | 0.65 | 0.0101 |                                |                 |
|                 |      |       | 0.7  | 0.0108 |                                |                 |
|                 |      |       | 0.75 | 0.0123 |                                |                 |
|                 |      |       | 0.8  | 0.0124 |                                |                 |
|                 |      |       | 0.85 | 0.0136 |                                |                 |
|                 |      |       | 0.9  | 0.0137 |                                |                 |
| A + B + AA + BB | 2.09 | OH-H6 | 0.15 | 0.0028 | $1.28 \pm 0.09 \times 10^{-2}$ | $3.24 \pm 0.04$ |
|                 |      |       | 0.2  | 0.0034 |                                |                 |
|                 |      |       | 0.25 | 0.0044 |                                |                 |
|                 |      |       | 0.3  | 0.0052 |                                |                 |
|                 |      |       | 0.35 | 0.0057 |                                |                 |
|                 |      |       | 0.4  | 0.0065 |                                |                 |
|                 |      |       | 0.45 | 0.0072 |                                |                 |
|                 |      |       | 0.5  | 0.0075 |                                |                 |
|                 |      |       | 0.55 | 0.0086 |                                |                 |
| C + D           | 4.34 |       | 0.6  | 0.0093 |                                |                 |
|                 |      |       | 0.65 | 0.0098 |                                |                 |
|                 |      |       | 0.7  | 0.0101 |                                |                 |
|                 |      |       | 0.75 | 0.0107 |                                |                 |
|                 |      |       | 0.8  | 0.0098 |                                |                 |
|                 |      |       | 0.85 | 0.0117 |                                |                 |
|                 |      |       | 0.9  | 0.0122 |                                |                 |
| A + B           | 3.27 | OH-H6 | 0.15 | 0.0028 | $1.28 \pm 0.09 \times 10^{-2}$ | $3.24 \pm 0.04$ |
|                 |      |       | 0.2  | 0.0034 |                                |                 |
|                 |      |       | 0.25 | 0.0044 |                                |                 |
|                 |      |       | 0.3  | 0.0052 |                                |                 |
|                 |      |       | 0.35 | 0.0057 |                                |                 |
|                 |      |       | 0.4  | 0.0065 |                                |                 |
|                 |      |       | 0.45 | 0.0072 |                                |                 |
|                 |      |       | 0.5  | 0.0075 |                                |                 |
|                 |      |       | 0.55 | 0.0086 |                                |                 |
| AA + BB         | 1.88 |       | 0.6  | 0.0093 |                                |                 |
|                 |      |       | 0.65 | 0.0098 |                                |                 |
|                 |      |       | 0.7  | 0.0101 |                                |                 |
|                 |      |       | 0.75 | 0.0107 |                                |                 |
|                 |      |       | 0.8  | 0.0098 |                                |                 |
|                 |      |       | 0.85 | 0.0117 |                                |                 |
|                 |      |       | 0.9  | 0.0122 |                                |                 |

**Table S3.** Normalized integral intensities of the cross-peaks, cross-relaxation rates, and proton-proton distances in the MFA molecule used to calculate the conformer's populations in scCO<sub>2</sub> + DMSO-d<sub>6</sub> (45 °C; 9 MPa).

| Groups          | r <sub>calc</sub> , Å | Dist.                  | Mixing Time | Relative Integral Intensity | Cross-Relaxation rate, s <sup>-1</sup> | r <sub>exp</sub> , Å |  |
|-----------------|-----------------------|------------------------|-------------|-----------------------------|----------------------------------------|----------------------|--|
| A-BB            | 2.76                  | H6-H11/<br>12<br>(Ref) | 0.5         | 0.0175                      | 4.18 ± 0.3 × 10 <sup>-2</sup>          | -                    |  |
|                 |                       |                        | 0.6         | 0.0222                      |                                        |                      |  |
|                 |                       |                        | 0.7         | 0.0263                      |                                        |                      |  |
|                 |                       |                        | 0.8         | 0.0336                      |                                        |                      |  |
|                 |                       |                        | 0.9         | 0.0379                      |                                        |                      |  |
| A + C + AA      | 3.12                  | H9/10-H<br>11/12       | 0.5         | 0.0073                      | 1.56 ± 0.09 × 10 <sup>-2</sup>         | 3.25 ± 0.06          |  |
| B + D + BB      | 4.62                  |                        | 0.6         | 0.0082                      |                                        |                      |  |
|                 |                       |                        | 0.7         | 0.0101                      |                                        |                      |  |
|                 |                       |                        | 0.8         | 0.0125                      |                                        |                      |  |
|                 |                       |                        | 0.9         | 0.0143                      |                                        |                      |  |
| A + B + AA + BB | 2.09                  | OH-H6                  | 0.5         | 0.0041                      | 0.99 ± 0.08 × 10 <sup>-2</sup>         | 3.51 ± 0.09          |  |
| C + D           | 4.34                  |                        | 0.6         | 0.0048                      |                                        |                      |  |
|                 |                       |                        | 0.7         | 0.0064                      |                                        |                      |  |
|                 |                       |                        | 0.8         | 0.0075                      |                                        |                      |  |
|                 |                       |                        | 0.9         | 0.0092                      |                                        |                      |  |
| A + B           | 3.27                  | OH-H6                  | 0.5         | 0.0041                      |                                        |                      |  |
|                 |                       |                        | 0.6         | 0.0048                      |                                        |                      |  |
| AA + BB         | 1.88                  |                        | 0.7         | 0.0064                      |                                        |                      |  |
|                 |                       |                        | 0.8         | 0.0075                      |                                        |                      |  |
|                 |                       |                        | 0.9         | 0.0092                      |                                        |                      |  |

**Table S4.** The energy value, structure, coordinates of atoms, and the values of their magnetic shielding obtained from the data of quantum chemical calculations for conformer A MFA.

| Conformer A Energy [B3LYP/6-311 + G(2d,p)]: -786.103161016 Hartrees                 |                |              |                       |            |            |                               |            |
|-------------------------------------------------------------------------------------|----------------|--------------|-----------------------|------------|------------|-------------------------------|------------|
| 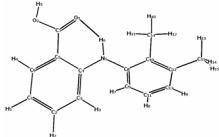 |                |              |                       |            |            |                               |            |
| NMR Atom Assignment                                                                 | Number of Atom | Type of Atom | Cartesian Coordinates |            |            | GIAO Magnetic Shielding Value |            |
|                                                                                     |                |              | X                     | Y          | Z          | Isotropic                     | Anisotropy |
| C11                                                                                 | 1              | C            | 3.5077230             | 1.9514650  | 0.6797400  | 64.2483                       | 161.7342   |
| C5                                                                                  | 2              | C            | 2.2283320             | 2.4990980  | 0.8189910  | 43.4392                       | 188.7689   |
| C12                                                                                 | 3              | C            | 1.0987960             | 1.7585120  | 0.5402800  | 67.0328                       | 158.4338   |
| C2                                                                                  | 4              | C            | 1.1920860             | 0.4197070  | 0.1028500  | 26.6988                       | 170.5302   |
| C13                                                                                 | 5              | C            | 2.4972220             | -0.1472500 | -0.0191290 | 70.8070                       | 134.6337   |
| C6                                                                                  | 6              | C            | 3.6249480             | 0.6401880  | 0.2703430  | 44.4374                       | 186.7397   |
| H11                                                                                 | 7              | H            | 4.3885410             | 2.5407160  | 0.8986340  | 25.1479                       | 3.8846     |
| H5                                                                                  | 8              | H            | 2.1135490             | 3.5216180  | 1.1607460  | 24.4827                       | 5.7578     |
| H12                                                                                 | 9              | H            | 0.1214140             | 2.1994580  | 0.6743540  | 24.6500                       | 11.4082    |
| H6                                                                                  | 10             | H            | 4.6021200             | 0.1895660  | 0.1679030  | 23.6297                       | 7.8532     |
| C1                                                                                  | 11             | C            | 2.6739520             | -1.5418890 | -0.4280800 | 7.1983                        | 97.6875    |
| =O                                                                                  | 12             | O            | 1.7797190             | -2.3520730 | -0.6286820 | -51.7522                      | 453.8324   |
| -O                                                                                  | 13             | O            | 3.9690560             | -1.9184970 | -0.5799740 | 124.2022                      | 180.4740   |
| OH                                                                                  | 14             | H            | 3.9442030             | -2.8522640 | -0.8382270 | 26.4385                       | 9.8351     |
| N                                                                                   | 15             | N            | 0.0766940             | -0.3285300 | -0.1619900 | 136.0226                      | 78.3520    |
| NH                                                                                  | 16             | H            | 0.2697490             | -1.3064430 | -0.3546160 | 22.1525                       | 18.0949    |
| C3                                                                                  | 17             | C            | -1.2579580            | 0.1270820  | -0.2988950 | 38.2300                       | 141.2724   |
| C10                                                                                 | 18             | C            | -1.5480210            | 1.2238830  | -1.1146230 | 56.4677                       | 168.4255   |
| C7                                                                                  | 19             | C            | -2.2917900            | -0.5818670 | 0.3388780  | 44.9491                       | 172.3756   |

|     |    |   |            |            |            |          |          |
|-----|----|---|------------|------------|------------|----------|----------|
| C9  | 20 | C | -2.8594060 | 1.6312150  | -1.2897250 | 53.0539  | 176.2622 |
| H10 | 21 | H | -0.7416110 | 1.7359760  | -1.6236060 | 24.3796  | 9.5310   |
| C4  | 22 | C | -3.6233960 | -0.1758310 | 0.1316760  | 37.8531  | 189.0063 |
| C8  | 23 | C | -3.8891260 | 0.9312900  | -0.6721350 | 52.7418  | 149.6283 |
| H9  | 24 | H | -3.0819720 | 2.4803810  | -1.9249270 | 24.5962  | 4.9966   |
| H8  | 25 | H | -4.9166330 | 1.2428820  | -0.8221040 | 24.7011  | 6.4024   |
| C15 | 26 | C | -1.9729140 | -1.7659280 | 1.2172390  | 168.4083 | 16.8768  |
| H15 | 27 | H | -2.0045160 | -2.7065820 | 0.6556600  | 29.9402  | 9.1541   |
|     | 28 | H | -0.9752070 | -1.6805820 | 1.6470460  | 29.3678  | 6.8475   |
|     | 29 | H | -2.6858300 | -1.8602410 | 2.0364660  | 29.7736  | 7.5039   |
| C14 | 30 | C | -4.7703300 | -0.9190810 | 0.7724340  | 159.8300 | 30.8109  |
| H14 | 31 | H | -4.7671910 | -1.9789830 | 0.5038860  | 29.5277  | 7.5918   |
|     | 32 | H | -4.7286640 | -0.8670210 | 1.8645230  | 29.3440  | 7.3841   |
|     | 33 | H | -5.7257240 | -0.4977680 | 0.4583720  | 29.7723  | 7.7549   |

**Table S5.** The energy value, structure, coordinates of atoms, and the values of their magnetic shielding obtained from the data of quantum chemical calculations for conformer B MFA.

| Conformer B Energy [B3LYP/6-311 + G(2d,p)]: -786.102589748 Hartrees               |                |              |                       |            |            |                               |            |
|-----------------------------------------------------------------------------------|----------------|--------------|-----------------------|------------|------------|-------------------------------|------------|
| 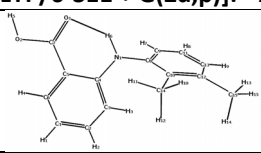 |                |              |                       |            |            |                               |            |
| NMR Atom Assignment                                                               | Number of Atom | Type of Atom | Cartesian Coordinates |            |            | GIAO Magnetic Shielding Value |            |
|                                                                                   |                |              | X                     | Y          | Z          | Isotropic                     | Anisotropy |
| C11                                                                               | 1              | C            | 2.9830990             | 2.2977990  | -0.6241520 | 64.7947                       | 160.8037   |
| C5                                                                                | 2              | C            | 1.6226860             | 2.5248980  | -0.8551150 | 42.5810                       | 190.0385   |
| C12                                                                               | 3              | C            | 0.6882480             | 1.5290980  | -0.6592950 | 67.1245                       | 155.3384   |
| C2                                                                                | 4              | C            | 1.0718340             | 0.2451870  | -0.2166360 | 24.4906                       | 175.4423   |
| C13                                                                               | 5              | C            | 2.4624130             | 0.0057390  | 0.0014120  | 71.7664                       | 133.1066   |
| C6                                                                                | 6              | C            | 3.3838970             | 1.0462540  | -0.2052390 | 44.4893                       | 186.761    |
| H11                                                                               | 7              | H            | 3.7091890             | 3.0851330  | -0.7786310 | 25.1714                       | 3.9868     |
| H5                                                                                | 8              | H            | 1.2892510             | 3.4974290  | -1.1995960 | 24.5051                       | 6.4230     |
| H12                                                                               | 9              | H            | -0.3570330            | 1.7220600  | -0.8579700 | 25.6542                       | 11.7156    |
| H6                                                                                | 10             | H            | 4.4312470             | 0.8425950  | -0.0316090 | 23.6107                       | 7.7653     |
| C1                                                                                | 11             | C            | 2.9364920             | -1.3150270 | 0.4174650  | 6.9231                        | 97.1448    |
| =O                                                                                | 12             | O            | 2.2440810             | -2.3101550 | 0.5772720  | -53.6010                      | 458.9161   |
| -O                                                                                | 13             | O            | 4.2764900             | -1.3861930 | 0.6258700  | 124.9274                      | 182.2667   |
| OH                                                                                | 14             | H            | 4.4550590             | -2.3031700 | 0.8835540  | 26.4667                       | 9.8436     |
| N                                                                                 | 15             | N            | 0.1431820             | -0.7344940 | -0.0015530 | 140.3582                      | 49.0369    |
| NH                                                                                | 16             | H            | 0.5304810             | -1.6544220 | 0.1827190  | 22.1043                       | 18.3819    |
| C3                                                                                | 17             | C            | -1.2558870            | -0.6239300 | -0.2544230 | 39.0878                       | 137.9923   |
| C10                                                                               | 18             | C            | -1.7754240            | -1.2893280 | -1.3659050 | 52.1812                       | 156.4795   |
| C7                                                                                | 19             | C            | -2.0995130            | 0.0882890  | 0.6138410  | 39.4743                       | 180.6434   |
| C9                                                                                | 20             | C            | -3.1342140            | -1.2458060 | -1.6332110 | 51.7108                       | 178.2366   |
| H10                                                                               | 21             | H            | -1.0986210            | -1.8308210 | -2.0157310 | 24.6499                       | 8.1194     |
| C4                                                                                | 22             | C            | -3.4762570            | 0.1472080  | 0.3209420  | 37.8056                       | 190.5075   |
| C8                                                                                | 23             | C            | -3.9736900            | -0.5211590 | -0.7961880 | 50.2867                       | 154.0110   |
| H9                                                                                | 24             | H            | -3.5365940            | -1.7639750 | -2.4953910 | 24.5255                       | 4.8012     |
| H8                                                                                | 25             | H            | -5.0358080            | -0.4753200 | -1.0097960 | 24.5137                       | 6.5231     |
| C15                                                                               | 26             | C            | -1.5600630            | 0.7649190  | 1.8473320  | 167.7335                      | 19.3317    |
| H15                                                                               | 27             | H            | -2.1749970            | 0.5335610  | 2.7199340  | 30.0479                       | 8.6267     |
|                                                                                   | 28             | H            | -0.5404310            | 0.4505870  | 2.0581760  | 29.3921                       | 7.7883     |
|                                                                                   | 29             | H            | -1.5575510            | 1.8545410  | 1.7407300  | 30.0503                       | 7.1951     |
| C14                                                                               | 30             | C            | -4.4197070            | 0.9136270  | 1.2144550  | 160.3062                      | 30.9767    |
| H14                                                                               | 31             | H            | -4.4507770            | 0.4934570  | 2.2243060  | 29.4676                       | 7.6731     |



|    |   |            |           |           |         |        |
|----|---|------------|-----------|-----------|---------|--------|
| 32 | H | -4.1193980 | 1.9601520 | 1.3176150 | 29.5706 | 7.2196 |
| 33 | H | -5.4343470 | 0.8938120 | 0.8157310 | 29.7215 | 7.9856 |

**Table S6.** The energy value, structure, coordinates of atoms, and the values of their magnetic shielding obtained from the data of quantum chemical calculations for conformer C MFA.

| Conformer C Energy [B3LYP/6-311 + G(2d,p)]: -786.097060464 Hartrees               |                |              |                       |            |            |                               |            |
|-----------------------------------------------------------------------------------|----------------|--------------|-----------------------|------------|------------|-------------------------------|------------|
| 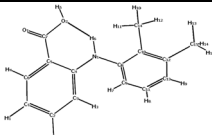 |                |              |                       |            |            |                               |            |
| NMR Atom Assignment                                                               | Number of Atom | Type of Atom | Cartesian Coordinates |            |            | GIAO Magnetic Shielding Value |            |
|                                                                                   |                |              | X                     | Y          | Z          | Isotropic                     | Anisotropy |
| C11                                                                               | 1              | C            | 3.4899430             | 1.9817550  | 0.6754480  | 62.6384                       | 163.9127   |
| C5                                                                                | 2              | C            | 2.2002480             | 2.4968710  | 0.8271970  | 43.6798                       | 187.4218   |
| C12                                                                               | 3              | C            | 1.0903340             | 1.7227510  | 0.5597810  | 66.0500                       | 158.763    |
| C2                                                                                | 4              | C            | 1.2084380             | 0.3863280  | 0.1218180  | 29.5040                       | 167.5947   |
| C13                                                                               | 5              | C            | 2.5241950             | -0.1466710 | -0.0140000 | 67.7752                       | 128.559    |
| C6                                                                                | 6              | C            | 3.6308060             | 0.6739110  | 0.2646590  | 41.3379                       | 192.9403   |
| H11                                                                               | 7              | H            | 4.3596560             | 2.5908200  | 0.8843580  | 25.0371                       | 3.9408     |
| H5                                                                                | 8              | H            | 2.0593330             | 3.5157980  | 1.1697570  | 24.4933                       | 5.8561     |
| H12                                                                               | 9              | H            | 0.1031310             | 2.1381900  | 0.7035200  | 24.6797                       | 11.6312    |
| H6                                                                                | 10             | H            | 4.6117310             | 0.2340570  | 0.1435480  | 23.3638                       | 7.4962     |
| C1                                                                                | 11             | C            | 2.8697580             | -1.5189730 | -0.4337430 | 11.3293                       | 76.3155    |
| =O                                                                                | 12             | O            | 3.9895100             | -1.9260560 | -0.6417170 | -64.9048                      | 471.7770   |
| -O                                                                                | 13             | O            | 1.8038360             | -2.3727000 | -0.5757000 | 120.9487                      | 187.6655   |
| OH                                                                                | 14             | H            | 2.1821620             | -3.2206650 | -0.8556410 | 25.9262                       | 9.9952     |
| N                                                                                 | 15             | N            | 0.0797920             | -0.3613310 | -0.1258710 | 137.6461                      | 61.5659    |
| NH                                                                                | 16             | H            | 0.2314170             | -1.3457460 | -0.2788710 | 24.2498                       | 16.4077    |
| C3                                                                                | 17             | C            | -1.2467650            | 0.1099580  | -0.2923660 | 37.6662                       | 141.6637   |
| C10                                                                               | 18             | C            | -1.5114810            | 1.1859290  | -1.1437120 | 56.4680                       | 169.0132   |
| C7                                                                                | 19             | C            | -2.2981420            | -0.5644230 | 0.3540770  | 45.6508                       | 170.9799   |
| C9                                                                                | 20             | C            | -2.8149060            | 1.6049370  | -1.3469250 | 52.5997                       | 177.3379   |
| H10                                                                               | 21             | H            | -0.6915720            | 1.6740420  | -1.6546390 | 24.3453                       | 9.6474     |
| C4                                                                                | 22             | C            | -3.6218710            | -0.1486210 | 0.1171860  | 37.8969                       | 188.4835   |
| C8                                                                                | 23             | C            | -3.8621360            | 0.9369750  | -0.7229340 | 52.6558                       | 149.8958   |
| H9                                                                                | 24             | H            | -3.0179480            | 2.4383800  | -2.0088690 | 24.6053                       | 5.0612     |
| H8                                                                                | 25             | H            | -4.8831890            | 1.2577670  | -0.8954970 | 24.6936                       | 6.3911     |
| C15                                                                               | 26             | C            | -2.0037810            | -1.7222360 | 1.2755130  | 168.5504                      | 16.8615    |
| H15                                                                               | 27             | H            | -2.0168810            | -2.6801510 | 0.7421850  | 29.9907                       | 9.0947     |
|                                                                                   | 28             | H            | -1.0201230            | -1.6194410 | 1.7339480  | 29.3787                       | 6.5142     |
|                                                                                   | 29             | H            | -2.7406360            | -1.7960740 | 2.0750500  | 29.6967                       | 7.5380     |
| C14                                                                               | 30             | C            | -4.7871270            | -0.8557320 | 0.7659920  | 159.8281                      | 30.8623    |
| H14                                                                               | 31             | H            | -4.7961470            | -1.9235640 | 0.5310520  | 29.5489                       | 7.6227     |
|                                                                                   | 32             | H            | -4.7590220            | -0.7691730 | 1.8563330  | 29.3351                       | 7.4141     |
|                                                                                   | 33             | H            | -5.7323020            | -0.4314390 | 0.4262440  | 29.7635                       | 7.7547     |

**Table S7.** The energy value, structure, coordinates of atoms, and the values of their magnetic shielding obtained from the data of quantum chemical calculations for conformer D MFA.

| Conformer D Energy [B3LYP/6-311 + G(2d,p)]: -786.096817760 Hartrees               |                |              |                       |            |            |                               |            |
|-----------------------------------------------------------------------------------|----------------|--------------|-----------------------|------------|------------|-------------------------------|------------|
| 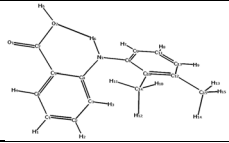 |                |              |                       |            |            |                               |            |
| NMR Atom Assignment                                                               | Number of Atom | Type of Atom | Cartesian Coordinates |            |            | GIAO Magnetic Shielding Value |            |
|                                                                                   |                |              | X                     | Y          | Z          | Isotropic                     | Anisotropy |
| C11                                                                               | 1              | C            | 2.9522520             | 2.3276680  | -0.6307440 | 63.118                        | 163.3419   |
| C5                                                                                | 2              | C            | 1.5883820             | 2.5243020  | -0.8570660 | 42.9201                       | 188.6323   |
| C12                                                                               | 3              | C            | 0.6806020             | 1.5044660  | -0.6551540 | 66.7143                       | 156.1176   |
| C2                                                                                | 4              | C            | 1.0889150             | 0.2286000  | -0.2129330 | 27.1560                       | 172.3265   |
| C13                                                                               | 5              | C            | 2.4838390             | 0.0202850  | -0.0014100 | 68.5298                       | 128.0695   |
| C6                                                                                | 6              | C            | 3.3765740             | 1.0843770  | -0.2119910 | 41.2493                       | 193.257    |
| H11                                                                               | 7              | H            | 3.6627500             | 3.1285860  | -0.7879540 | 25.0853                       | 4.0394     |
| H5                                                                                | 8              | H            | 1.2287010             | 3.4870600  | -1.2024420 | 24.5136                       | 6.5212     |
| H12                                                                               | 9              | H            | -0.3689300            | 1.6748580  | -0.8510020 | 25.6954                       | 11.9633    |
| H6                                                                                | 10             | H            | 4.4257070             | 0.8880940  | -0.0351050 | 23.3329                       | 7.4129     |
| C1                                                                                | 11             | C            | 3.1193690             | -1.2412080 | 0.4256860  | 10.9575                       | 76.9835    |
| =O                                                                                | 12             | O            | 4.2940280             | -1.3833260 | 0.6773910  | -63.9567                      | 471.8753   |
| -O                                                                                | 13             | O            | 2.2730800             | -2.3177890 | 0.5188710  | 120.3058                      | 186.2024   |
| OH                                                                                | 14             | H            | 2.8262010             | -3.0624710 | 0.8016550  | 25.8898                       | 10.1477    |
| N                                                                                 | 15             | N            | 0.1490530             | -0.7504740 | 0.0121000  | 142.4738                      | 40.4811    |
| NH                                                                                | 16             | H            | 0.5052230             | -1.6866100 | 0.1265360  | 24.0171                       | 16.7474    |
| C3                                                                                | 17             | C            | -1.2488020            | -0.6287940 | -0.2489190 | 38.9057                       | 138.3220   |
| C10                                                                               | 18             | C            | -1.7699990            | -1.2899840 | -1.3622460 | 52.8779                       | 154.8584   |
| C7                                                                                | 19             | C            | -2.0902560            | 0.0878650  | 0.6178320  | 39.2970                       | 180.8962   |
| C9                                                                                | 20             | C            | -3.1283260            | -1.2404410 | -1.6314700 | 51.5564                       | 178.3103   |
| H10                                                                               | 21             | H            | -1.0954420            | -1.8314210 | -2.0148270 | 24.6558                       | 8.1312     |
| C4                                                                                | 22             | C            | -3.4659480            | 0.1546430  | 0.3219340  | 37.4616                       | 190.9199   |
| C8                                                                                | 23             | C            | -3.9653150            | -0.5116740 | -0.7957480 | 50.2450                       | 154.1284   |
| H9                                                                                | 24             | H            | -3.5316810            | -1.7555410 | -2.4950190 | 24.5086                       | 4.8304     |
| H8                                                                                | 25             | H            | -5.0267320            | -0.4600220 | -1.0112710 | 24.5068                       | 6.5161     |
| C15                                                                               | 26             | C            | -1.5488470            | 0.7623250  | 1.8514310  | 167.7302                      | 19.4532    |
| H15                                                                               | 27             | H            | -2.1682020            | 0.5382060  | 2.7227720  | 30.0428                       | 8.6586     |
|                                                                                   | 28             | H            | -0.5321250            | 0.4404870  | 2.0649450  | 29.3635                       | 7.6642     |
|                                                                                   | 29             | H            | -1.5368270            | 1.8515650  | 1.7422520  | 30.0571                       | 7.1654     |
| C14                                                                               | 30             | C            | -4.4067230            | 0.9270430  | 1.2130210  | 160.2984                      | 30.9814    |
| H14                                                                               | 31             | H            | -4.4410010            | 0.5088860  | 2.2235700  | 29.4683                       | 7.6774     |
|                                                                                   | 32             | H            | -4.1012310            | 1.9721760  | 1.3146180  | 29.5641                       | 7.2237     |
|                                                                                   | 33             | H            | -5.4209430            | 0.9115460  | 0.8131420  | 29.7160                       | 7.9965     |

**Table S8.** The energy value, structure, coordinates of atoms, and the values of their magnetic shielding obtained from the data of quantum chemical calculations for conformer AA MFA.

| Conformer AA Energy [B3LYP/6-311 + G(2d,p)]: -786.093686558 Hartrees                |                |              |                       |           |            |                               |            |
|-------------------------------------------------------------------------------------|----------------|--------------|-----------------------|-----------|------------|-------------------------------|------------|
| 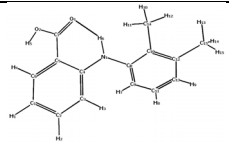 |                |              |                       |           |            |                               |            |
| NMR Atom Assignment                                                                 | Number of Atom | Type of Atom | Cartesian Coordinates |           |            | GIAO Magnetic Shielding Value |            |
|                                                                                     |                |              | X                     | Y         | Z          | Isotropic                     | Anisotropy |
| C11                                                                                 | 1              | C            | -3.5448970            | 1.8974770 | -0.7085350 | 64.0498                       | 161.8697   |
| C5                                                                                  | 2              | C            | -2.2787520            | 2.4778360 | -0.8192790 | 44.4476                       | 188.0788   |
| C12                                                                                 | 3              | C            | -1.1377190            | 1.7541480 | -0.5436480 | 64.6512                       | 163.2319   |

|     |    |   |            |            |            |          |          |
|-----|----|---|------------|------------|------------|----------|----------|
| C2  | 4  | C | -1.2038540 | 0.4038050  | -0.1377670 | 27.9030  | 168.4245 |
| C13 | 5  | C | -2.4968050 | -0.1886540 | -0.0036850 | 66.7740  | 133.8085 |
| C6  | 6  | C | -3.6322440 | 0.5792860  | -0.3088210 | 51.1475  | 169.562  |
| H11 | 7  | H | -4.4372180 | 2.4603250  | -0.9483190 | 25.1424  | 3.9705   |
| H5  | 8  | H | -2.1833390 | 3.5069620  | -1.1458980 | 24.4860  | 5.6624   |
| H12 | 9  | H | -0.1682660 | 2.2150670  | -0.6679480 | 24.4655  | 11.4482  |
| H6  | 10 | H | -4.6151560 | 0.1212580  | -0.2742520 | 24.4045  | 7.2132   |
| C1  | 11 | C | -2.6313230 | -1.5983090 | 0.4244890  | 9.5176   | 91.7982  |
| =O  | 12 | O | -1.7353760 | -2.4171880 | 0.3875240  | -75.6431 | 548.7127 |
| -O  | 13 | O | -3.8388060 | -2.0041010 | 0.8944910  | 134.9635 | 135.2242 |
| OH  | 14 | H | -4.4267070 | -1.2485740 | 1.0163550  | 25.0559  | 8.3083   |
| N   | 15 | N | -0.0730560 | -0.3332900 | 0.0908100  | 136.3198 | 98.0519  |
| NH  | 16 | H | -0.2444570 | -1.3298240 | 0.1826490  | 22.0646  | 17.3735  |
| C3  | 17 | C | 1.2489830  | 0.1363260  | 0.2705320  | 38.0528  | 143.2825 |
| C10 | 18 | C | 1.5074490  | 1.2313440  | 1.0989630  | 58.8236  | 167.1311 |
| C7  | 19 | C | 2.3058160  | -0.5621390 | -0.3421810 | 45.7568  | 171.2882 |
| C9  | 20 | C | 2.8106090  | 1.6491410  | 1.3088680  | 53.0922  | 176.3116 |
| H10 | 21 | H | 0.6855560  | 1.7332870  | 1.5929810  | 24.4374  | 9.5518   |
| C4  | 22 | C | 3.6273510  | -0.1455550 | -0.0991610 | 37.9473  | 188.3545 |
| C8  | 23 | C | 3.8620010  | 0.9618240  | 0.7150360  | 52.9773  | 148.9065 |
| H9  | 24 | H | 3.0090290  | 2.4971640  | 1.9535250  | 24.6135  | 5.0493   |
| H8  | 25 | H | 4.8822510  | 1.2824220  | 0.8923600  | 24.7313  | 6.4112   |
| C15 | 26 | C | 2.0103450  | -1.7463220 | -1.2289020 | 168.4157 | 17.0826  |
| H15 | 27 | H | 1.9132450  | -2.6718990 | -0.6499010 | 29.8258  | 9.2355   |
|     | 28 | H | 1.0733990  | -1.6091170 | -1.7700060 | 29.4718  | 6.2248   |
|     | 29 | H | 2.8001390  | -1.9088240 | -1.9608760 | 29.6575  | 7.4925   |
| C14 | 30 | C | 4.8002430  | -0.8747250 | -0.7094200 | 29.3254  | 7.3742   |
| H14 | 31 | H | 4.8066790  | -1.9332160 | -0.4359180 | 29.7905  | 7.6929   |
|     | 32 | H | 4.7854540  | -0.8266920 | -1.8022280 | 64.0498  | 161.8697 |
|     | 33 | H | 5.7410150  | -0.4378930 | -0.3732540 | 44.4476  | 188.0788 |

**Table S9.** The energy value, structure, coordinates of atoms, and the values of their magnetic shielding obtained from the data of quantum chemical calculations for conformer BB MFA.

| Conformer BB Energy [B3LYP/6-311 + G(2d,p)]: -786.092908265 Hartrees                |                |              |                       |            |            |                               |            |
|-------------------------------------------------------------------------------------|----------------|--------------|-----------------------|------------|------------|-------------------------------|------------|
| 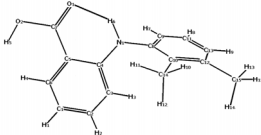 |                |              |                       |            |            |                               |            |
| NMR Atom Assignment                                                                 | Number of Atom | Type of Atom | Cartesian Coordinates |            |            | GIAO Magnetic Shielding Value |            |
|                                                                                     |                |              | X                     | Y          | Z          | Isotropic                     | Anisotropy |
| C11                                                                                 | 1              | C            | 2.9939610             | 2.2668470  | -0.6785870 | 64.8592                       | 160.7723   |
| C5                                                                                  | 2              | C            | 1.6315270             | 2.5131840  | -0.8637190 | 43.4400                       | 189.3400   |
| C12                                                                                 | 3              | C            | 0.6951270             | 1.5230580  | -0.6509550 | 65.2059                       | 158.7814   |
| C2                                                                                  | 4              | C            | 1.0757660             | 0.2289080  | -0.2359870 | 24.9579                       | 174.3607   |
| C13                                                                                 | 5              | C            | 2.4658040             | -0.0238350 | -0.0237900 | 68.6757                       | 132.8166   |
| C6                                                                                  | 6              | C            | 3.3858510             | 1.0085280  | -0.2668550 | 51.0374                       | 169.6375   |
| H11                                                                                 | 7              | H            | 3.7291500             | 3.0375400  | -0.8682770 | 25.1933                       | 4.0708     |
| H5                                                                                  | 8              | H            | 1.2997460             | 3.4907080  | -1.1944840 | 24.5002                       | 6.3684     |
| H12                                                                                 | 9              | H            | -0.3525530            | 1.7255040  | -0.8259240 | 25.5611                       | 11.8032    |
| H6                                                                                  | 10             | H            | 4.4495270             | 0.8156740  | -0.1734540 | 24.4408                       | 7.1753     |
| C1                                                                                  | 11             | C            | 2.9200180             | -1.3622000 | 0.4135280  | 9.6745                        | 91.1977    |
| =O                                                                                  | 12             | O            | 2.2409880             | -2.3676500 | 0.3679900  | -73.3708                      | 554.4830   |
| -O                                                                                  | 13             | O            | 4.1822490             | -1.4763030 | 0.9021850  | 137.4400                      | 135.8186   |
| OH                                                                                  | 14             | H            | 4.5816550             | -0.6058760 | 1.0194460  | 24.9594                       | 8.2499     |
| N                                                                                   | 15             | N            | 0.1432190             | -0.7502150 | -0.0341270 | 140.2205                      | 68.506     |

|     |    |   |            |            |            |          |          |
|-----|----|---|------------|------------|------------|----------|----------|
| NH  | 16 | H | 0.5314900  | -1.6843260 | 0.0547260  | 21.8408  | 18.2506  |
| C3  | 17 | C | -1.2574050 | -0.6215590 | -0.2654000 | 39.179   | 138.6282 |
| C10 | 18 | C | -1.7991700 | -1.2709650 | -1.3760100 | 52.7470  | 156.2713 |
| C7  | 19 | C | -2.0814770 | 0.0895280  | 0.6223290  | 40.4494  | 179.3266 |
| C9  | 20 | C | -3.1607320 | -1.2098680 | -1.6240640 | 51.4369  | 178.6023 |
| H10 | 21 | H | -1.1379510 | -1.8141110 | -2.0404340 | 24.6274  | 8.0643   |
| C4  | 22 | C | -3.4609910 | 0.1677440  | 0.3476390  | 37.7005  | 190.5081 |
| C8  | 23 | C | -3.9807320 | -0.4833500 | -0.7695470 | 50.3796  | 153.8457 |
| H9  | 24 | H | -3.5802890 | -1.7156470 | -2.4853730 | 24.5029  | 4.8277   |
| H8  | 25 | H | -5.0449010 | -0.4232810 | -0.9686810 | 24.5178  | 6.5177   |
| C15 | 26 | C | -1.5184910 | 0.7419290  | 1.8584540  | 167.8345 | 19.7490  |
| H15 | 27 | H | -2.1356950 | 0.5206670  | 2.7318010  | 30.0303  | 8.6078   |
|     | 28 | H | -0.5074120 | 0.3966230  | 2.0627930  | 29.4386  | 7.6764   |
|     | 29 | H | -1.4854480 | 1.8321430  | 1.7613700  | 30.0654  | 7.1221   |
| C14 | 30 | C | -4.3844360 | 0.9348230  | 1.2613150  | 160.2410 | 31.0133  |
| H14 | 31 | H | -4.4112980 | 0.5010450  | 2.2655070  | 29.4505  | 7.6888   |
|     | 32 | H | -4.0689590 | 1.9757090  | 1.3754830  | 29.5756  | 7.2098   |
|     | 33 | H | -5.4032180 | 0.9341130  | 0.8728850  | 29.7187  | 7.9782   |

**Table S10.** Structure, coordinates of atoms, and the values of their magnetic shielding obtained from the data of quantum chemical calculations for TMS.

| TMS                                                                                |              |                       |         |         |                               |            |
|------------------------------------------------------------------------------------|--------------|-----------------------|---------|---------|-------------------------------|------------|
| 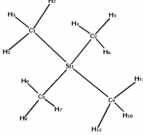 |              |                       |         |         |                               |            |
| Number of Atom                                                                     | Type of Atom | Cartesian Coordinates |         |         | GIAO Magnetic Shielding Value |            |
|                                                                                    |              | X                     | Y       | Z       | Isotropic                     | Anisotropy |
| 1                                                                                  | Si           | 0.0001                | -0.0001 | 0.0001  | 385.7967                      | 0.0000     |
| 2                                                                                  | C            | -0.9231               | -0.1714 | -1.6233 | 192.5440                      | 5.3805     |
| 3                                                                                  | C            | 0.8883                | 1.6510  | 0.0427  | 192.5440                      | 5.3805     |
| 4                                                                                  | C            | 1.2519                | -1.3874 | 0.1568  | 192.5440                      | 5.3805     |
| 5                                                                                  | C            | -1.2172               | -0.0922 | 1.4236  | 192.5440                      | 5.3805     |
| 6                                                                                  | H            | -1.4495               | -1.1294 | -1.6692 | 32.0644                       | 9.8877     |
| 7                                                                                  | H            | -1.6598               | 0.6296  | -1.7351 | 32.0644                       | 9.8877     |
| 8                                                                                  | H            | -0.2308               | -0.1203 | -2.4688 | 32.0644                       | 9.8877     |
| 9                                                                                  | H            | 1.6044                | 1.7260  | -0.7809 | 32.0644                       | 9.8877     |
| 10                                                                                 | H            | 0.1752                | 2.4758  | -0.0476 | 32.0644                       | 9.8877     |
| 11                                                                                 | H            | 1.4342                | 1.7720  | 0.9831  | 32.0644                       | 9.8877     |
| 12                                                                                 | H            | 1.8026                | -1.3064 | 1.0986  | 32.0644                       | 9.8877     |
| 13                                                                                 | H            | 0.7543                | -2.3614 | 0.1340  | 32.0644                       | 9.8877     |
| 14                                                                                 | H            | 1.9729                | -1.3521 | -0.6653 | 32.0644                       | 9.8877     |
| 15                                                                                 | H            | -0.6990               | 0.0058  | 2.3822  | 32.0644                       | 9.8877     |
| 16                                                                                 | H            | -1.9578               | 0.7099  | 1.3513  | 32.0644                       | 9.8877     |
| 17                                                                                 | H            | -1.7473               | -1.0491 | 1.4175  | 32.0644                       | 9.8877     |
